# Supplementary material for: Application of biogenic iron phosphate for lithium-ion batteries
Source: Royal Society of Chemistry journal article supplement (doi:10.1039/c5ra11090d), 2015-01-01
Supplement: c5ra11090d1.pdf [file c5ra11090d1.pdf]

## Application of Biogenic Iron Phosphate for Lithium-Ion Batteries

Hiroyuki Kageyama,<sup>a</sup> Yasuo Hashimoto,<sup>a</sup> Yuya Oaki,<sup>a</sup> Siro Saito,<sup>b</sup> Yasuhiro Konishi,<sup>c</sup> and Hiroaki Imai<sup>a\*</sup>

<sup>a</sup> Department of Applied Chemistry, Faculty of Science and Technology, Keio University, 3-14-1 Hiyoshi, Kohoku-ku, Yokohama, Kanagawa, 223-8522 Japan.

<sup>b</sup> Aisin Seiki Co., Ltd, 2-1, Asahi-machi, Kariya, Aichi, 448-8650 Japan

<sup>c</sup> Department of Chemical Engineering, Osaka Prefecture University, 1-1 Gakuen-cho, Naka-ku, Sakai, Osaka 599-8531, Japan

\*Fax: +81455661551; Tel: +81455661556; E-mail: hiroaki@aplc.keio.ac.jp

†Electronic supplementary information (ESI): Figure S1 and S2

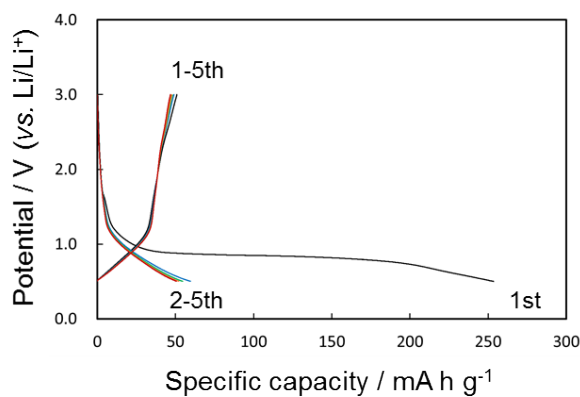

**Figure S1.** Charge–discharge curves of acetylene black and PTFE (90: 10 weight ratio) on Cu mesh at 50 mA h g<sup>-1</sup> (for all weight). Counter and reference electrode were metal lithium on Cu mesh.

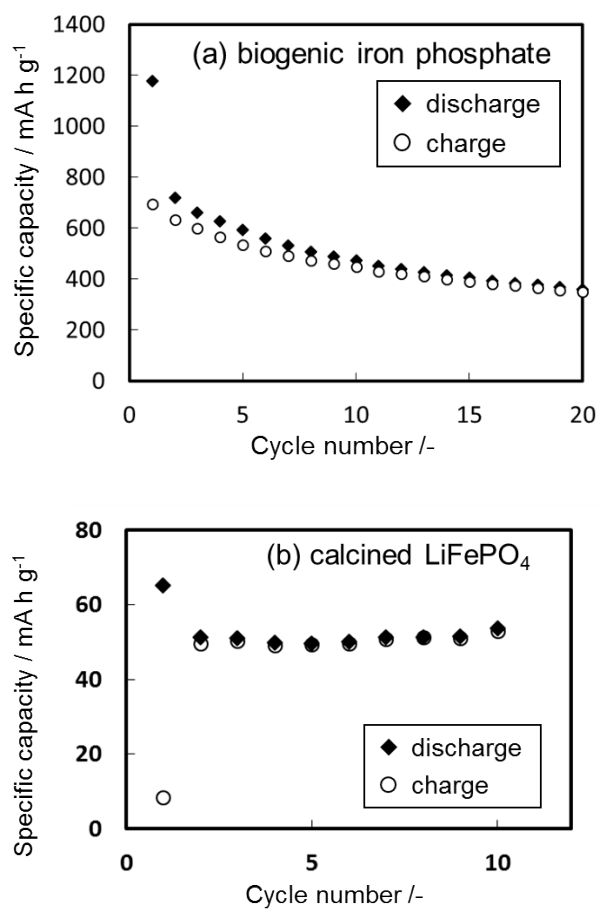

**Figure S2.** Charge–discharge capacity retention of the biogenic iron (II) phosphate at 50 mA g<sup>-1</sup> (a) and the calcined LiFePO<sub>4</sub> particles at 10 mA g<sup>-1</sup> (b). The active material, acetylene black, and PTFE were mixed for 50:45:5 in weight.
